# Supplementary material for: Evaluation of A Baculovirus-Expressed VP2 Subunit Vaccine for the Protection of White-Tailed Deer (Odocoileus virginianus) from Epizootic Hemorrhagic Disease
Source: PubMed Central journal article supplement (PMC7157196; doi:10.3390/vaccines8010059), 2020-01-31
Supplement: vaccines-08-00059-s001.pdf [file vaccines-08-00059-s001.pdf]

**Table S1: WTD used for the vaccine efficacy study**

| <b>Animal Number</b> | <b>Vaccine Group</b> | <b>Age at first vaccination (days)</b> | <b>Age at virus challenge (days)</b> | <b>Weight at day of challenge (kg)</b> |
|----------------------|----------------------|----------------------------------------|--------------------------------------|----------------------------------------|
| 1755                 | rVP2                 | 164                                    | 194                                  | 31.7                                   |
| 1756                 | sham vaccine         | 162                                    | 192                                  | 35.9                                   |
| 1760                 | sham vaccine         | 160                                    | 190                                  | 30                                     |
| 1763                 | rVP2                 | 158                                    | 188                                  | 26.3                                   |
| 1764                 | sham vaccine         | 155                                    | 185                                  | 32.3                                   |
| 1766                 | rVP2                 | 151                                    | 181                                  | 33.4                                   |
